# Supplementary material for: A phenazine-based near-infrared (NIR) chemodosimeter for cysteine obtained via a carbonyl-assisted cycloaddition process
Source: Royal Society of Chemistry journal article supplement (doi:10.1039/c5ra26784f), 2016-01-01
Supplement: c5ra26784f1.pdf [file c5ra26784f1.pdf]

## Supporting Information

# A Phenazine–based Near-infrared (NIR) Chemodosimeter for Cysteine Obtained via a Carbonyl-assisted Cycloaddition Process

*Yi Qu,<sup>a,\*</sup> Xiao Zhang,<sup>b</sup> Linlin Wang,<sup>a</sup> Huiran Yang,<sup>c</sup> Lin Yang,<sup>b</sup> Jian Cao<sup>a</sup>*

*and Jianli Hua<sup>b,\*</sup>*

a.College of Chemistry and Chemical Engineering, Shanghai University of  
Engineering Science, 201620, Shanghai China.

b. Key Laboratory for Advanced Materials and Institute of Fine Chemicals, East  
China University of Science and Technology, 200237, Shanghai, China.

c. Department of Chemistry, Fudan University, 200433, Shanghai, China.

---

# Outline

|                                                    |        |
|----------------------------------------------------|--------|
| NMR and HRMS spectra                               | S1-S13 |
| Plots for calculating the Detection Limited values |        |
| UV-vis method                                      | S14    |
| Emission method                                    | S15    |
| Excitation method                                  | S16    |
| MTT assay for valuating the cytotoxicity           | S17    |

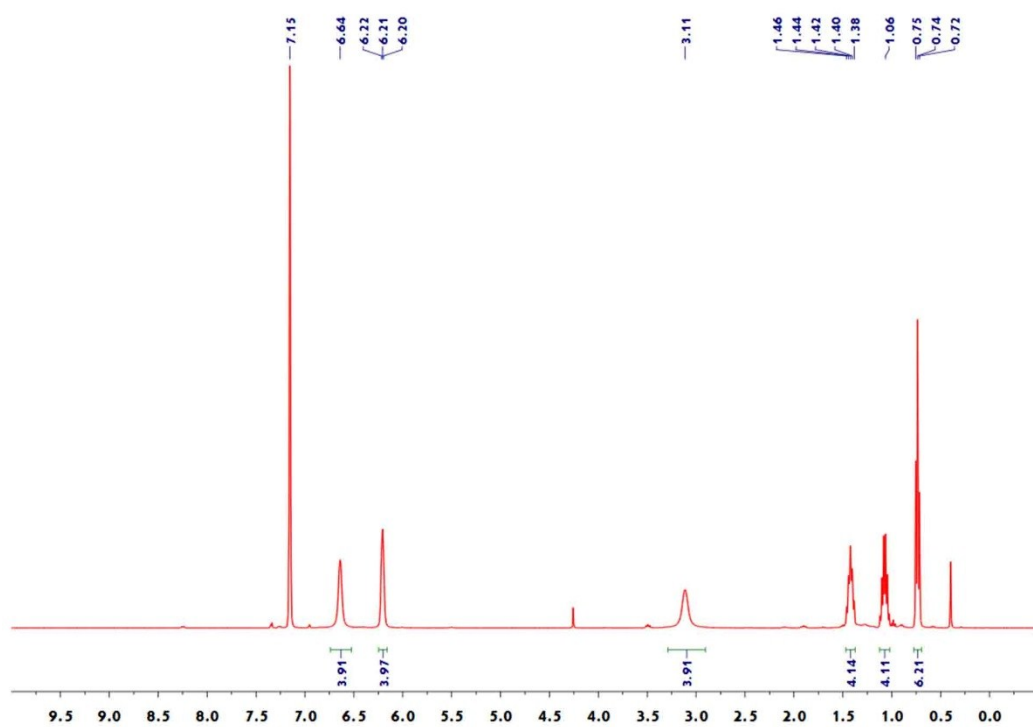

Figure S1. <sup>1</sup>H NMR of compound **2** in C<sub>6</sub>D<sub>6</sub>.

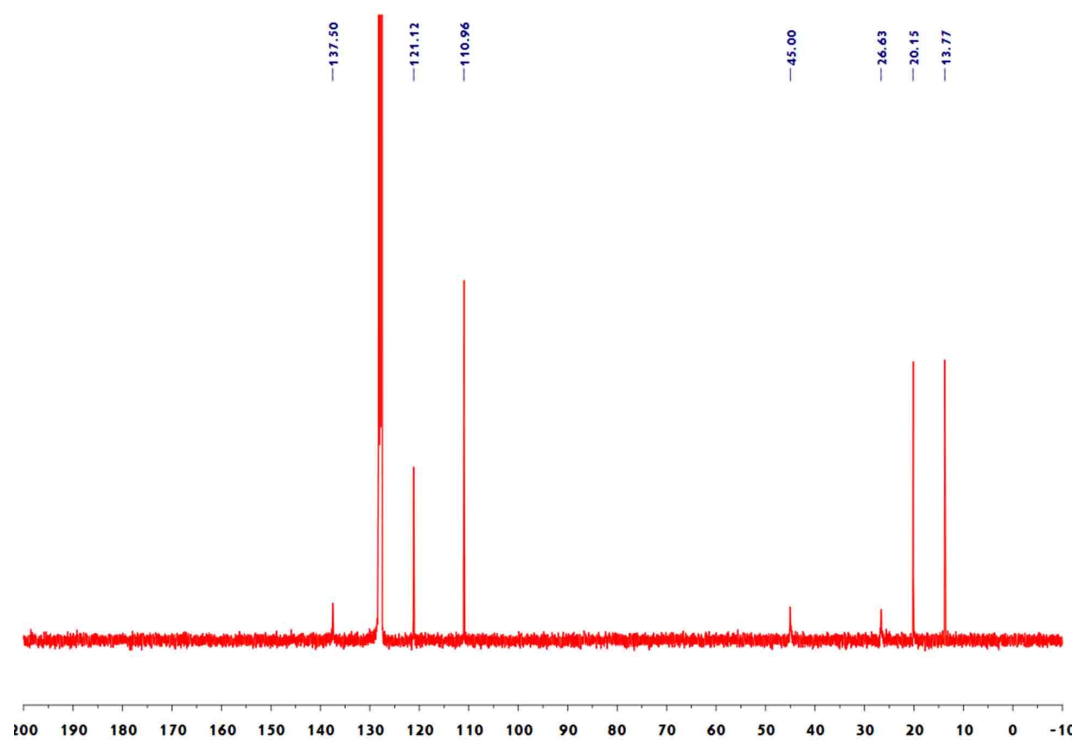

Figure S2. <sup>13</sup>C NMR of compound **2** in C<sub>6</sub>D<sub>6</sub>.

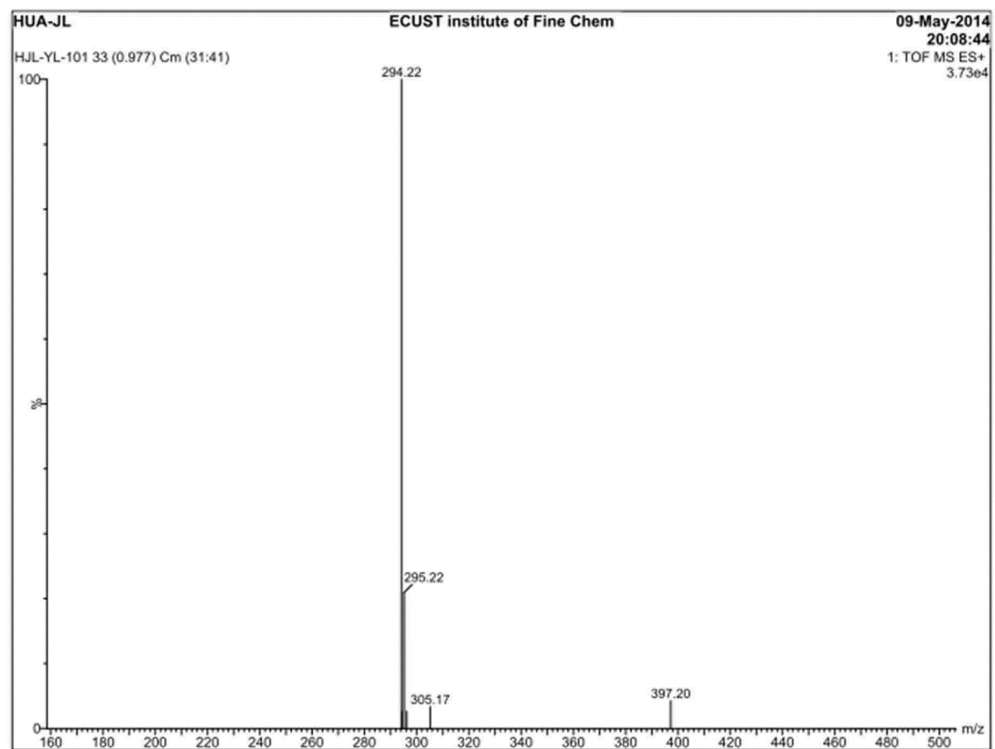

Figure S3. ESI-MS spectrum of compound **2**

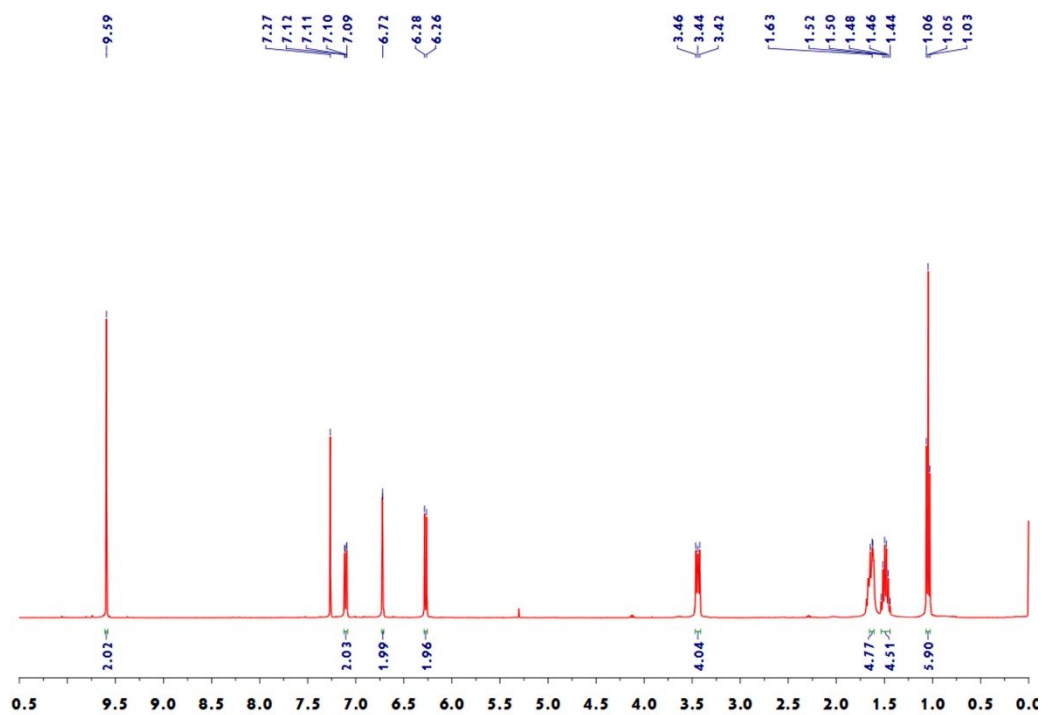

Figure S4.  $^1\text{H}$  NMR spectrum of compound **3** in  $\text{CDCl}_3$ .

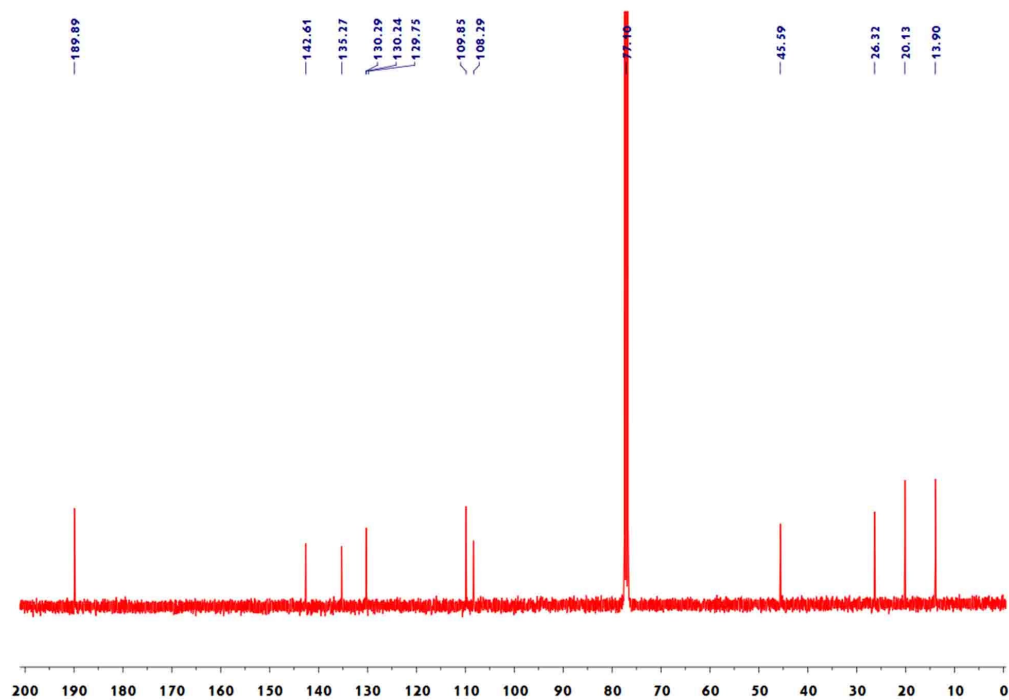

Figure S5.  $^{13}\text{C}$  NMR spectrum of compound **3** in  $\text{CDCl}_3$ .

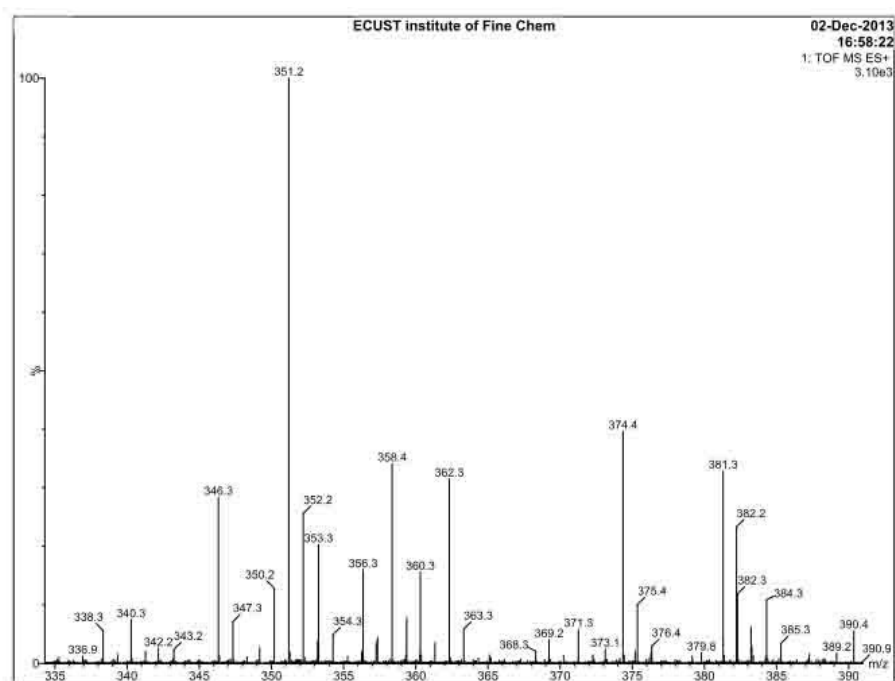

Figure S6. ESI-TOF mass spectrum of **3**

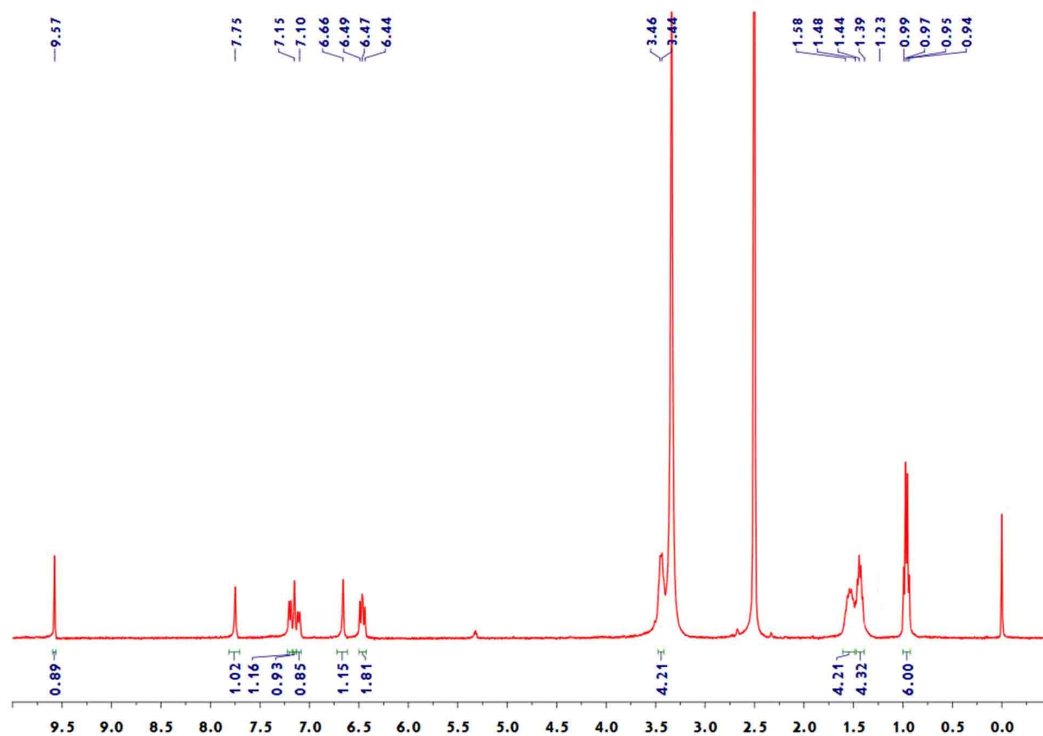

Figure S7. <sup>1</sup>H NMR of compound **4** in DMSO-*d*<sub>6</sub>.

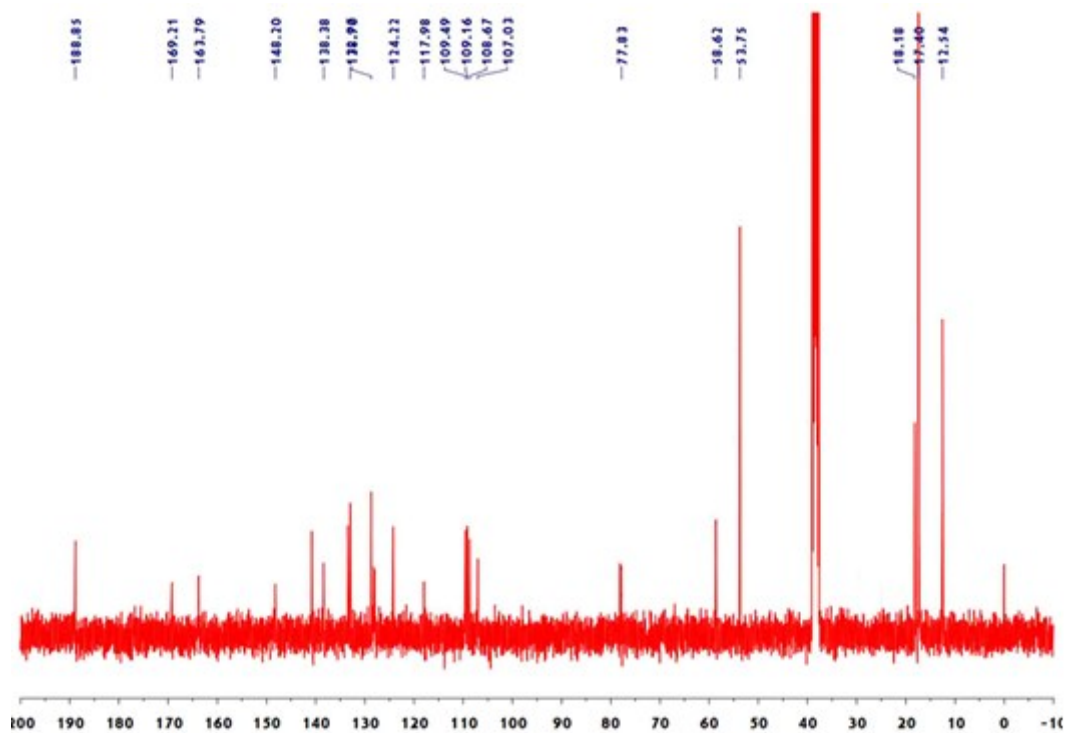

Figure S8. <sup>13</sup>C NMR of compound **4** in DMSO-*d*<sub>6</sub>.

### Single Mass Analysis

Tolerance = 30.0 mDa / DBE: min = -1.5, max = 100.0

Element prediction: Off

Number of isotope peaks used for i-FIT = 2

Monoisotopic Mass, Even Electron Ions

168 formula(e) evaluated with 11 results within limits (up to 1 closest results for each mass)

Elements Used:

C: 0-30 H: 0-80 N: 0-5 O: 0-5

HJL-JL

ECUST institute of Fine Chem

HJL-YL-220-2 17 (0.640) Cm (17:35)

23-Sep-2013

16:15:53

2: TOF MS ES-

1.33e+004

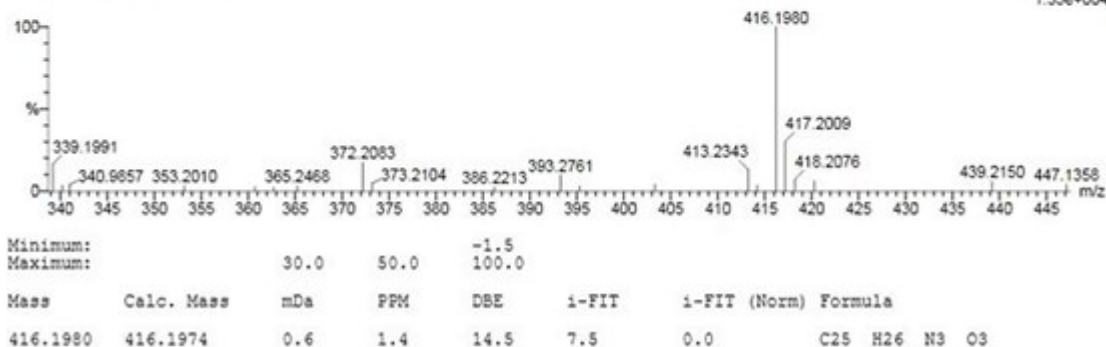

Figure S9. ESI mass spectrum of compound 4

This report was created by ACD/NMR Processor Academic Edition. For more information go to [www.acdlabs.com/nmrproc/](http://www.acdlabs.com/nmrproc/)

### PHS-H

2015-8-17 下午 02:01:09

|                        |                      |                   |                                       |                        |                                                                 |
|------------------------|----------------------|-------------------|---------------------------------------|------------------------|-----------------------------------------------------------------|
| Acquisition Time (sec) | 3.9846               | Comment           | 5 mm PABBO BB-1H/D Z-GRD Z104450/0038 | Date                   | 24 Jun 2015 08:21:20                                            |
| Date Stamp             | 24 Jun 2015 08:21:20 | Nucleus           | 1H                                    | File Name              | C:\Users\qy\Desktop\print\wil-20150624\wil-20150624\1\data\111r |
| Frequency (MHz)        | 400.13               | Owner             | nmrsu                                 | Number of Transients   | 16                                                              |
| Original Points Count  | 32768                | SW(cyclical) (Hz) | 8223.68                               | Points Count           | 32768                                                           |
| Receiver Gain          | 322.00               | Spectrum Type     | STANDARD                              | Solvent                | CHLOROFORM-d                                                    |
| Spectrum Offset (Hz)   | 2465.1101            | Sweep Width (Hz)  | 8223.43                               | Pulse Sequence         | zg30                                                            |
|                        |                      |                   |                                       | Temperature (degree C) | 26.260                                                          |

<sup>1</sup>H NMR (400 MHz, CHLOROFORM-d) δ ppm 1.05 (q, *J*=7.03 Hz, 6 H) 1.46 - 1.54 (m, 4 H) 1.59 (br. s., 4 H) 1.67 (br. s., 4 H) 3.48 (br. s., 4 H) 6.26 (d, *J*=8.28 Hz, 1 H) 6.35 (d, *J*=8.28 Hz, 1 H) 6.82 (s, 1 H) 7.06 (d, *J*=8.28 Hz, 1 H) 7.18 (d, *J*=7.78 Hz, 1 H) 7.32 (s, 1 H) 7.92 (s, 1 H) 9.63 (s, 1 H)

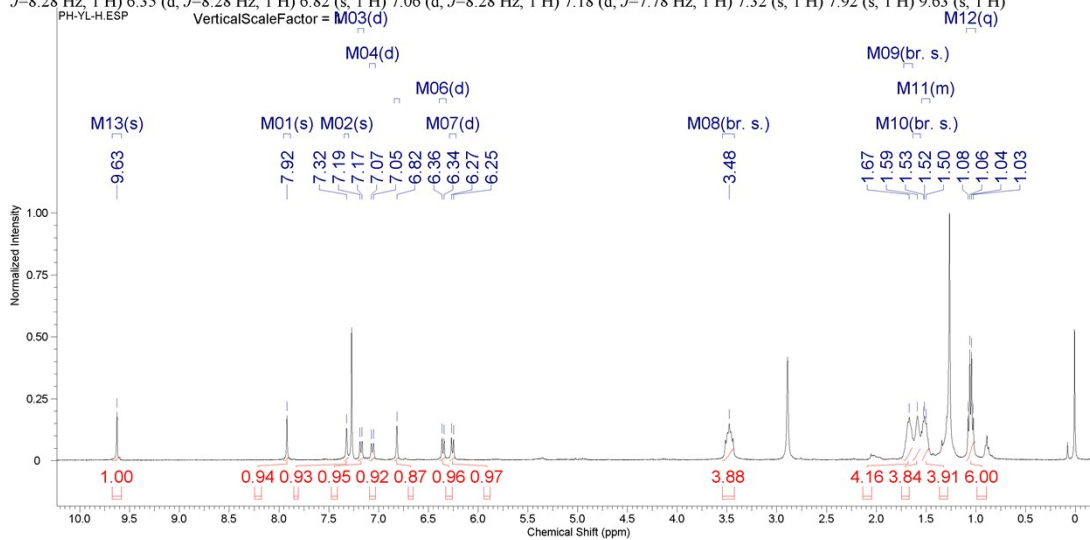

Fig S10. <sup>1</sup>H NMR spectrum of PHS in CDCl<sub>3</sub>.

## PHS-C

2015-8-17 下午 01:59:30

|                        |                      |                      |                                       |                       |                      |
|------------------------|----------------------|----------------------|---------------------------------------|-----------------------|----------------------|
| Acquisition Time (sec) | 1.3631               | Comment              | 5 mm PABBO BB-1H/D Z-GRD Z104450/0038 | Date                  | 25 Jun 2015 13:22:08 |
| Date Stamp             | 25 Jun 2015 13:22:08 | File Name            | H:\zs-wll-20150625-cl\1\data\1\1\1    | Frequency (MHz)       | 100.61               |
| Nucleus                | 13C                  | Number of Transients | 2000                                  | Origin                | spect                |
| Points Count           | 32768                | Pulse Sequence       | zgpg30                                | Receiver Gain         | 1150.00              |
| Solvent                | CHLOROFORM-d         | Spectrum Offset (Hz) | 10060.8047                            | Original Points Count | 32768                |
| Temperature (degree C) | 28.960               | Spectrum Type        | STANDARD                              | SW(cyclical) (Hz)     | 24038.46             |
|                        |                      |                      |                                       | Sweep Width (Hz)      | 24037.73             |

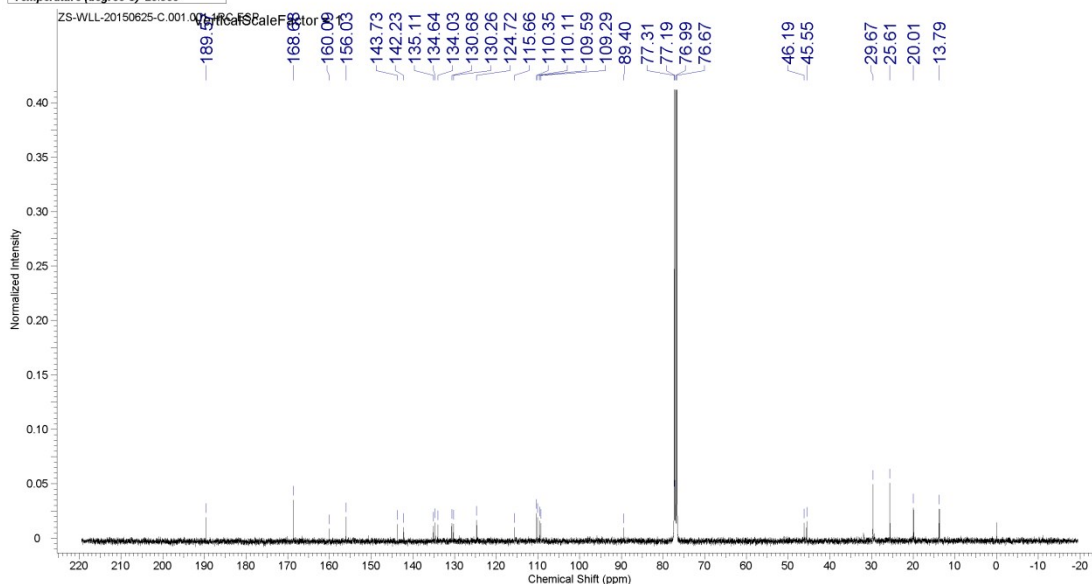Fig S11.  $^{13}\text{C}$  NMR spectrum of PHS in  $\text{CDCl}_3$ .

## Elemental Composition Report

Page 1

## Single Mass Analysis

Tolerance = 30.0 mDa / DBE: min = -1.5, max = 100.0

Element prediction: Off

Number of isotope peaks used for i-FIT = 2

Monoisotopic Mass, Even Electron Ions

249 formula(e) evaluated with 18 results within limits (up to 1 closest results for each mass)

Elements Used:

C: 0-34 H: 0-60 N: 0-4 O: 0-12

JL-HUA

ECUST Institute of Fine Chem

21-Sep-2013

16:41:22

1: TOF MS ES+

6.13e+002

HJL-YL-322 7 (0.298) Cm (5:10)

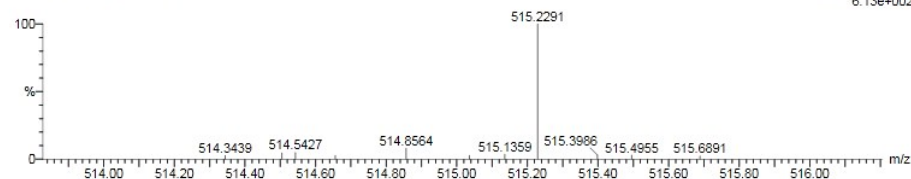

Minimum:

Maximum:

30.0 50.0 -1.5 100.0

| Mass     | Calc. Mass | mDa  | PPM  | DBE  | i-FIT | i-FIT (Norm) | Formula       |
|----------|------------|------|------|------|-------|--------------|---------------|
| 515.2291 | 515.2294   | -0.3 | -0.6 | 16.5 | 36.4  | 0.0          | C29 H31 N4 O5 |

Fig S12. HRMS spectrum of PHS



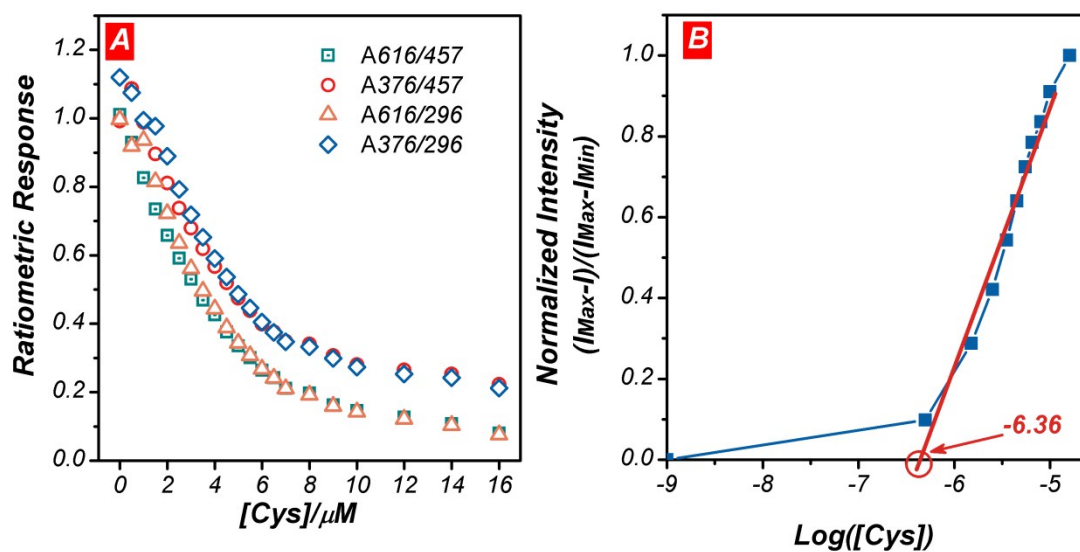

Fig S13. (a) Ratiometric plots of **PHS** with absorbance at 296 nm, 376 nm, 457 nm and 616 nm. (b) Detection limit of **PHS** by UV-vis spectra (Data were collected at 616 nm). The intensity was normalized between the minimum absorbance, found at 16  $\mu\text{M}$  Cys, and the maximum absorbance, found at zero Cys (shown on the graph as 1 nM) .

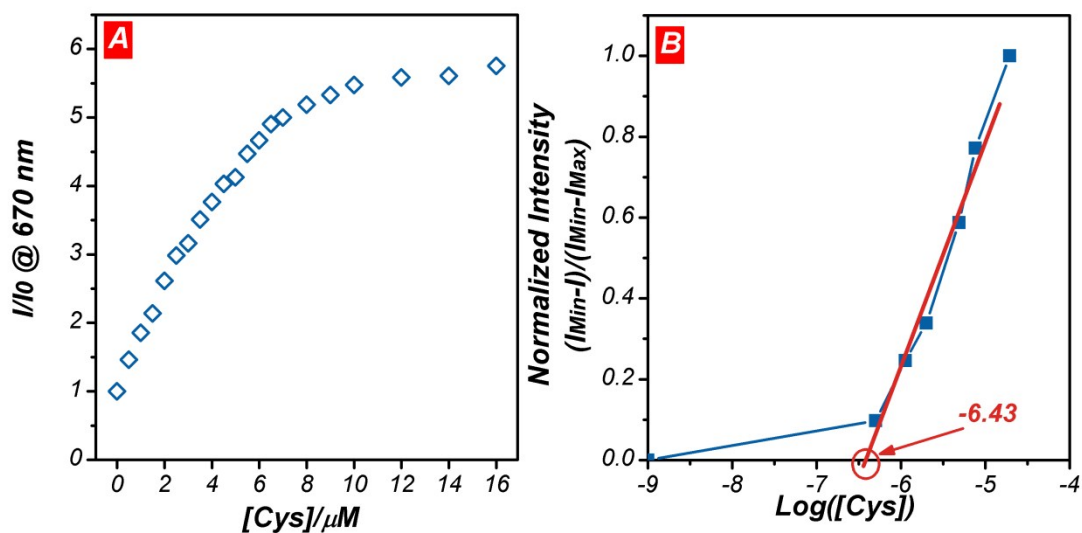

Fig S14. (a) Intensity enhancement plots of **PHS** at 670 nm. (b) Detection limit of **PHS** by emission spectra (Data were collected at 670 nm). The intensity was normalized between the minimum emission intensity, found at zero cys (shown on the graph as 1 nM), and the maximum absorbance, found at 16  $\mu M$  Cys.

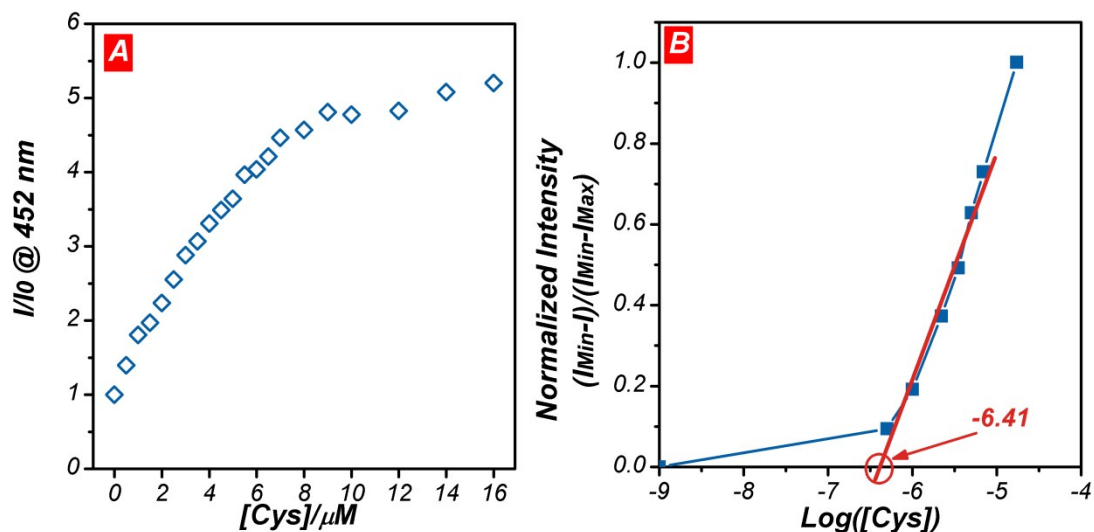

Fig S15. (a) Excitation intensity enhancement plots of **PHS** at 452 nm. (b) Detection limited of **PHS** by emission spectra (Data were collected at 452 nm). The intensity was normalized between the minimum emission intensity, found at zero Cys (shown on the graph as 1 nM), and the maximum absorbance, found at 16  $\mu\text{M}$  Cys.

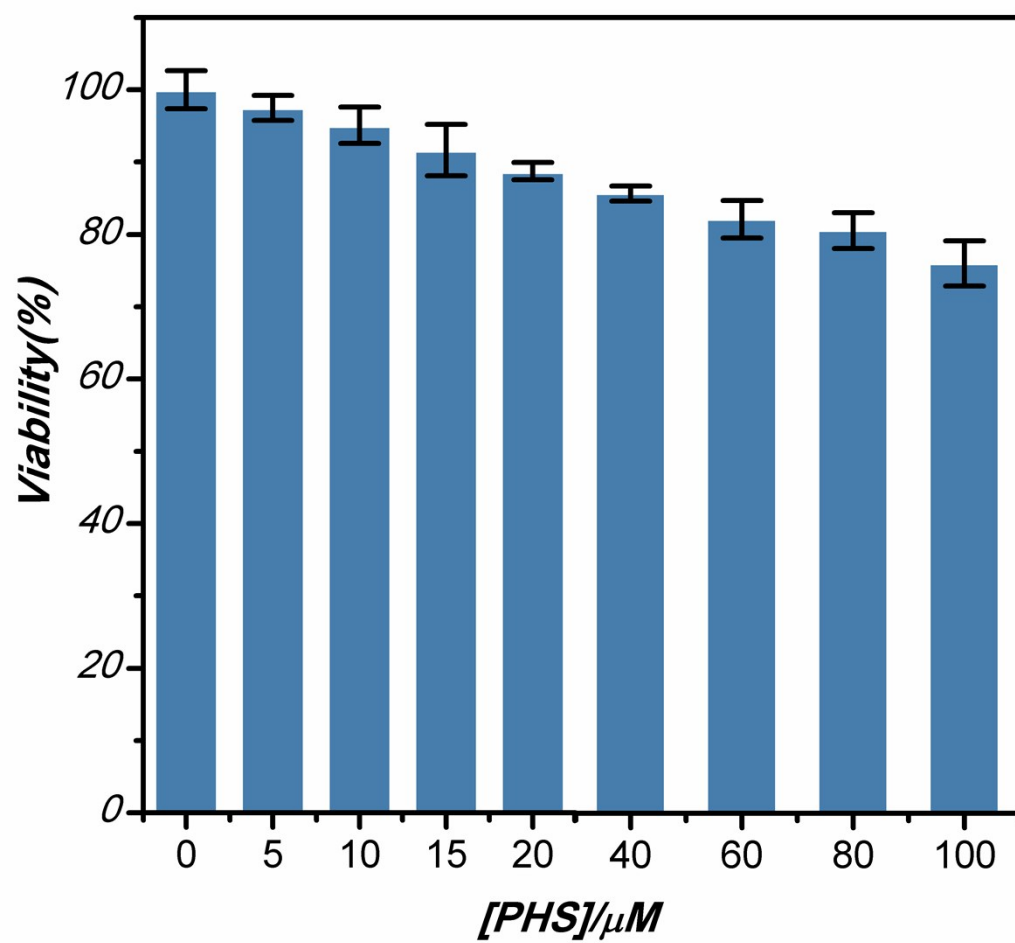

Fig S16.MTT assay of **PHS** with 0~ 100 μM Cys.
